# Supplementary material for: Molecular mechanisms of assembly and TRIP13-mediated remodeling of the human Shieldin complex
Source: PubMed Central journal article supplement (PMC7923543; doi:10.1073/pnas.2024512118), 2021-02-17
Supplement: pnas.2024512118.sapp.pdf [file pnas.2024512118.sapp.pdf]

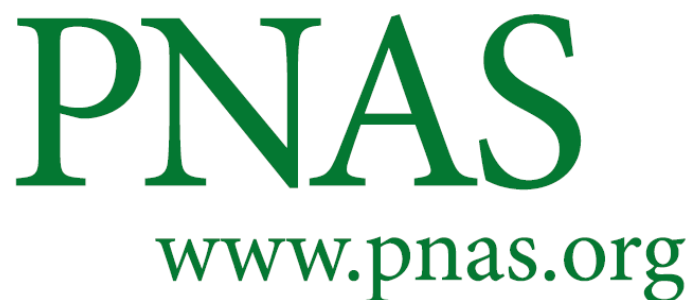

## Supplementary Information for

### **Molecular mechanisms of assembly and TRIP13-mediated remodeling of the human Shieldin complex**

**Wei Xie<sup>1,\*</sup>, Shengliu Wang<sup>1</sup>, Juncheng Wang<sup>1</sup>, M. Jason de la Cruz<sup>1</sup>, Guotai Xu<sup>2</sup>,  
Maurizio Scaltriti<sup>2</sup>, and Dinshaw J. Patel<sup>1,\*</sup>**

<sup>1</sup> Structural Biology Program  
Memorial Sloan Kettering Cancer Center  
New York, NY 10065, USA

<sup>2</sup> Human Oncology and Pathogenesis Program  
Memorial Sloan Kettering Cancer Center  
New York, NY 10065, USA

\* Correspondence: W.X. ([xiew@mskcc.org](mailto:xiew@mskcc.org)) and D.J.P. ([pateld@mskcc.org](mailto:pateld@mskcc.org));

#### **This PDF file includes:**

SI Figure and Video Captions

Figs. S1 to S12

Tables S1 to S2

## SI FIGURE CAPTIONS

**Fig. S1: Asymmetric unit of the SHLD3s–REV7 monomer complex and tracing of electron density of bound SHLD3s.** (A) One asymmetric unit contains two copies of SHLD3s-REV7 monomer complex. A black box highlights the ‘safety-belt’ segment. (B) 2Fo-Fc electron density of SHLD3s at a contour level of  $1\sigma$ .

**Fig. S2. Visualization and intermolecular contacts involving the ‘safety-belt’ segment of the SHLD3s-REV7 monomer complex.** (A, B) Two alternate views highlighting the threading of SHLD3 within a channel in the REV7 monomer associated with the ‘safety-belt’ concept. (C, D) Hydrophobic (panel C) and hydrogen bonding (panel D) interactions involving the ‘safety-belt’ segment of the complex. SHLD3 residues Pro-50, Leu-51, and Arg-52 form one  $\beta$  strand, interacting with REV7’s  $\beta 6$  and  $\beta 7$  strands (residues Val-150, Ile-172, Leu-173, and Ala-174) by backbone hydrogen bonds, assembling into an antiparallel sheet. In addition, SHLD3 Pro-53 and Pro-57 stack with Trp171 and Tyr63 of REV7 respectively, while the backbone carbonyl oxygens of SHLD3 Arg-55 and Pro-58 form two hydrogen bonds with the hydroxy groups in the side chain of REV7 Tyr-63 and Tyr-37.

**Fig. S3. Location of various binding sites on the surface of REV7 monomer.** (A-C) Location of ‘site-S’ (panel A), REV1-binding site (panel B) and ‘PockDrug’ site (panel C) on the  $\beta$ -sheet surface of REV7 monomer. Note that the two-component pocket scaffold (site-S and REV1-binding site) spanning REV7 monomer surface represents an attractive drug design target.

**Fig. S4: 2Fo-Fc electron densities related to x-ray structure of SHLD2.3–REV7<sub>4</sub> complex at a contour level of  $1\sigma$ .** (A) Electron density for overall structure of SHLD2.3–REV7<sub>4</sub> complex. (B) Close-up view of electron density for SHLD2 in the complex. (C), Close-up view of electron density for SHLD3 in the complex.

**Fig. S5: Cryo-EM Reconstruction of SHLD2.3–REV7<sub>4</sub>–TRIP13(E253Q) complex.** (A-D) Flow chart of image processing of SHLD2.3–REV7<sub>4</sub>–TRIP13(E253Q) complex. Final 3D reconstructed maps (consensus, focused and composite) colored according to local resolution estimation with RELION3. The focused map greatly improved the density quality in SHLD2.3–REV7<sub>4</sub> segment. (E) Fourier Shell Correlation (FSC) curve of SHLD2.3–REV7<sub>4</sub>–TRIP13(E253Q) complex and between two half maps (consensus and focused) that were calculated from two half datasets (FSC=0.143 indicated), and between the composite cryo-EM map and corresponding model (FSC=0.5 indicated).

**Fig. S6. Structure of the TRIP13(E253Q) hexamer in the SHLD2.3–REV7<sub>4</sub>–TRIP13(E253Q) complex.** (A, B) Hexameric ring topology of TRIP13(E253Q) in the SHLD2.3–REV7<sub>4</sub>–TRIP13(E253Q) complex shown in a ribbon (panel A) and electrostatic surface representation (panel B). ATP $\gamma$ S in a space-filling representation is bound to subunits A, B, C, D and E, but not F. (C, D) The closed folding topology of ATP $\gamma$ S-bound TRIP13(E253Q) subunit C and the open folding topology of ATP $\gamma$ S-free TRIP13(E253Q) subunit F.

**Fig. S7. Cryo-EM density for interacting segments in the SHLD2.3–REV7<sub>4</sub>–TRIP13(E253Q) complex.** (A) Density for the N-terminal C-REV7 segment that inserts into the central pore of the hexameric TRIP13 ring topology. (B) Density for the polyE segments of TRIP13 subunits B and C. (C) Interaction between the  $\alpha$ A helix of C-REV7 and finger helix 213-241 of TRIP13 A-subunit. (D) Interaction between loop 88-95 of O-REV7 and residues 104-127 and 230-240 of TRIP13 E-subunit.

**Fig. S8: Cryo-EM study of SHLD2.3–REV7<sub>2</sub>–TRIP13(E253Q) complex.** (A) Co-purification of the complex formed by TRIP13(E253Q) hexamer and SHLD2.3–REV7<sub>2</sub> in the presence of ATP $\gamma$ S by size-exclusion chromatography. (B) SDS-PAGE analysis of fractions from size-exclusion chromatography. (C) The overall structure of the SHLD2.3–REV7<sub>2</sub>–TRIP13(E253Q) complex with bound ATP $\gamma$ S shown in electron density.

**Fig. S9. Key interactions between C-REV7 and TRIP13 subunit B in the structure of the SHLD2.3–REV7<sub>4</sub>–TRIP13 complex.** Interaction between the inserted N-terminus (Asp8 to Val14) of C-REV7 and pore loops 1 and 2 from subunit B of TRIP13 and interaction between the C-REV7 ‘safety-belt’ and the poly-E loop of TRIP13 subunit B in the complex.

**Fig. S10. Rationale for replacing SHLD2.3 by SHLD2L.3 for generating a stable dimeric REV7 complex.** (A, B) Alignment of SHLD3  $\beta$ 1–SHLD2  $\beta$ 1–O-REV7  $\beta$ 6 to form a  $\beta$ -sheet in the SHLD2.3–REV7<sub>4</sub> (panel A, this work) and SHLD2–SHLD3–REV7 dimer (panel B, PDB 6KTO) complexes. (C) Sizing column elution pattern for SHLD2L.3–REV7<sub>2</sub> complex.

**Fig. S11. Cryo-EM Reconstruction of SHLD2L.3–REV7<sub>2</sub>–TRIP13(E253Q) complex.** The numbers of particles are shown above each of the three 3D classes. 3D reconstructed maps are colored according to local resolution estimation with RELION-3. 3D classification of the particles indicates conformational flexibility of the SHLD2L.3–REV7<sub>2</sub> in the complex as also shown in Fig. 6 C and D.

**Fig. S12. Structural and sequential comparison of REV7 and its paralog MAD2.** (A) Structure of C-REV7–C-REV7 dimer mediated by REV3, as revealed by the yeast DNA polymerase  $\zeta$  cryo-EM structure (PDB 6V93). (B, C, D) Structural comparison and superposition of REV7 conformational dimer (this work, panel B) and MAD2 conformational dimer (PDB 2V64, panel C). The two structures share a canonical dimeric architecture, with R.M.S.D=1.487 Å (panel D). (E) Secondary structures and structure-based sequence alignment of human REV7 and MAD2. The orange boxes highlight the loop 88-95 (site-3) and safety belt (site-4) regions that contact with TRIP13 but are not conserved between REV7 and MAD2.

**Supplementary Video 1. Movie of SHLD2.3–REV7 dimer complex remodeling mediated by the ATP-driven translocation of TRIP13 hexamer.** The TRIP13 hexamer is shown in ribbon representation while the SHLD2.3–REV7 dimer and ATP $\gamma$ S are shown in space-filling representation.

Xie et al., Figure S1

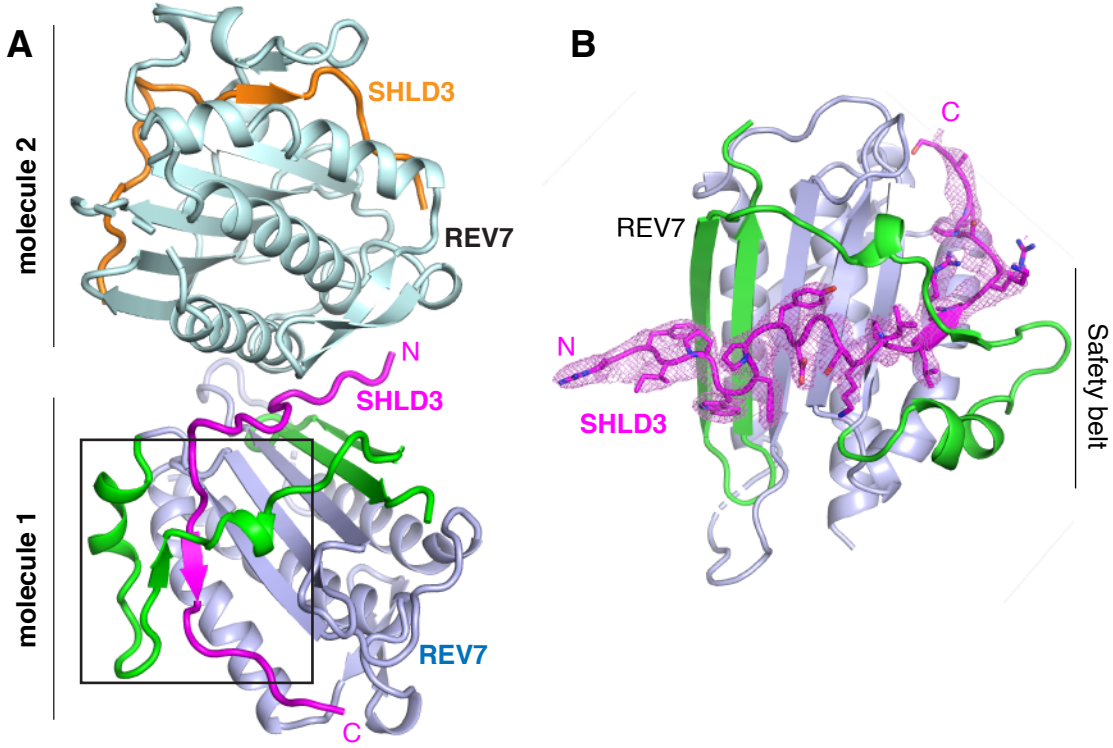

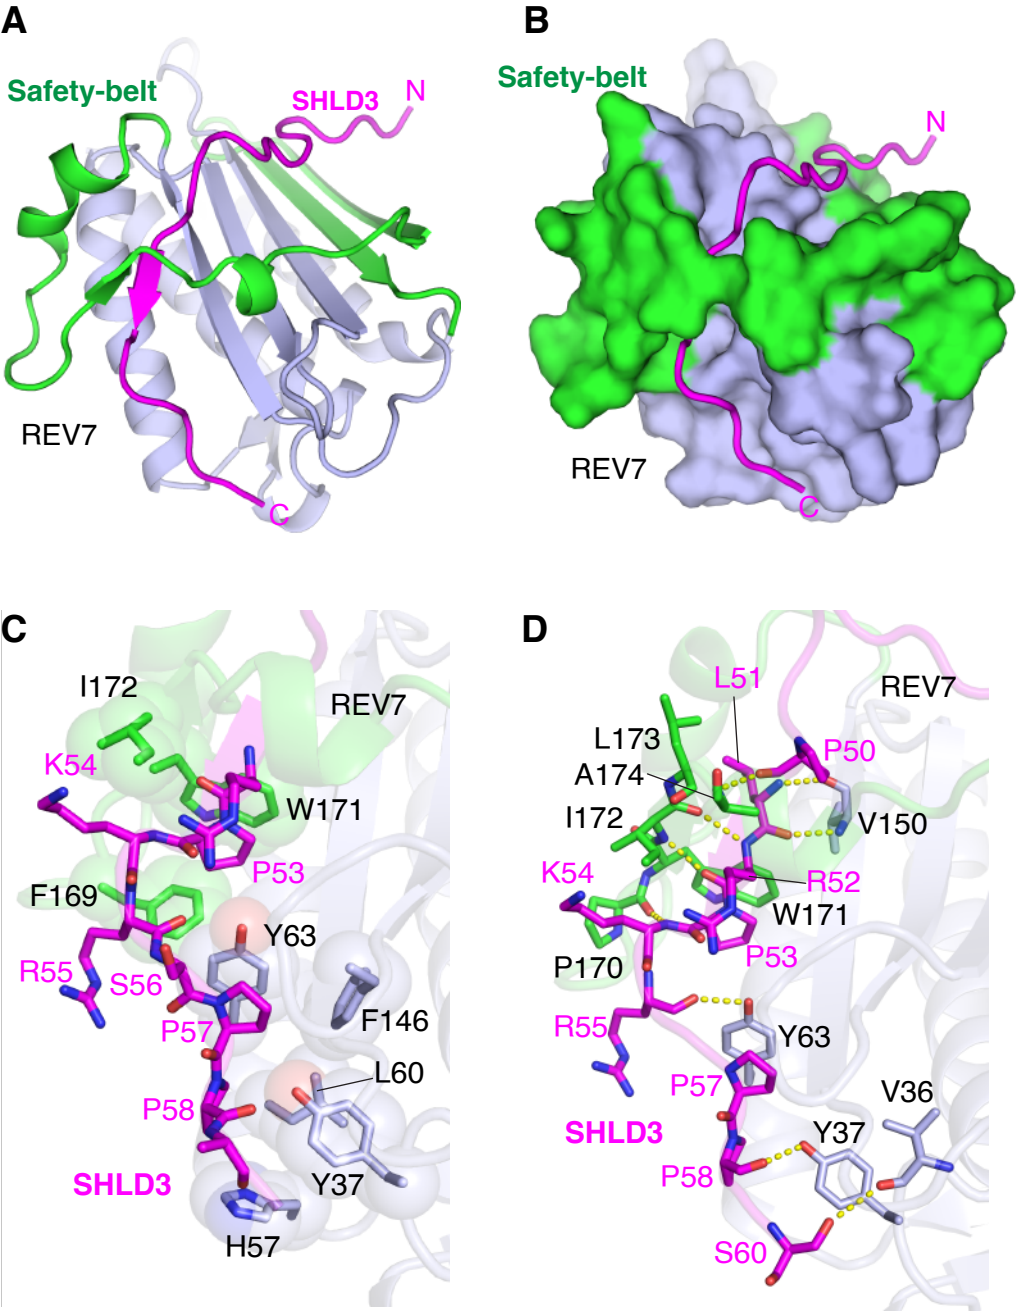

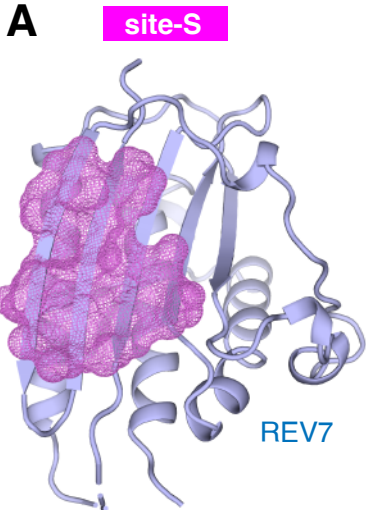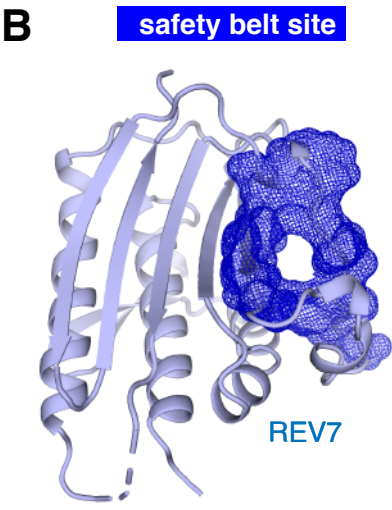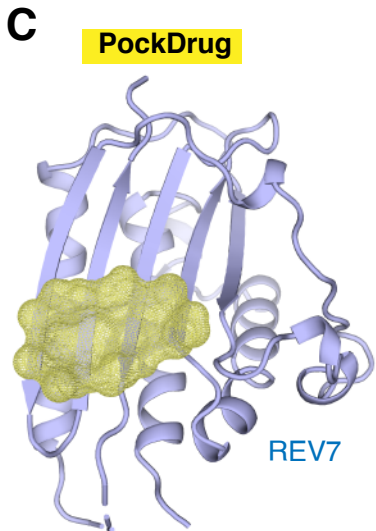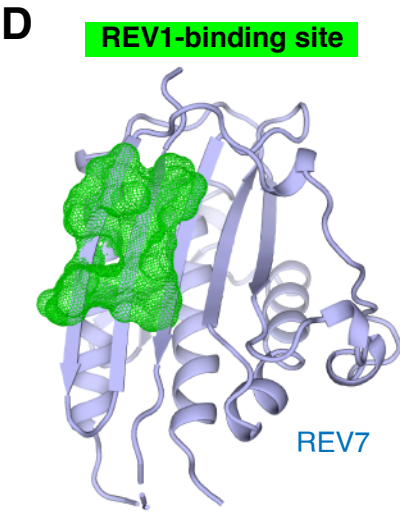

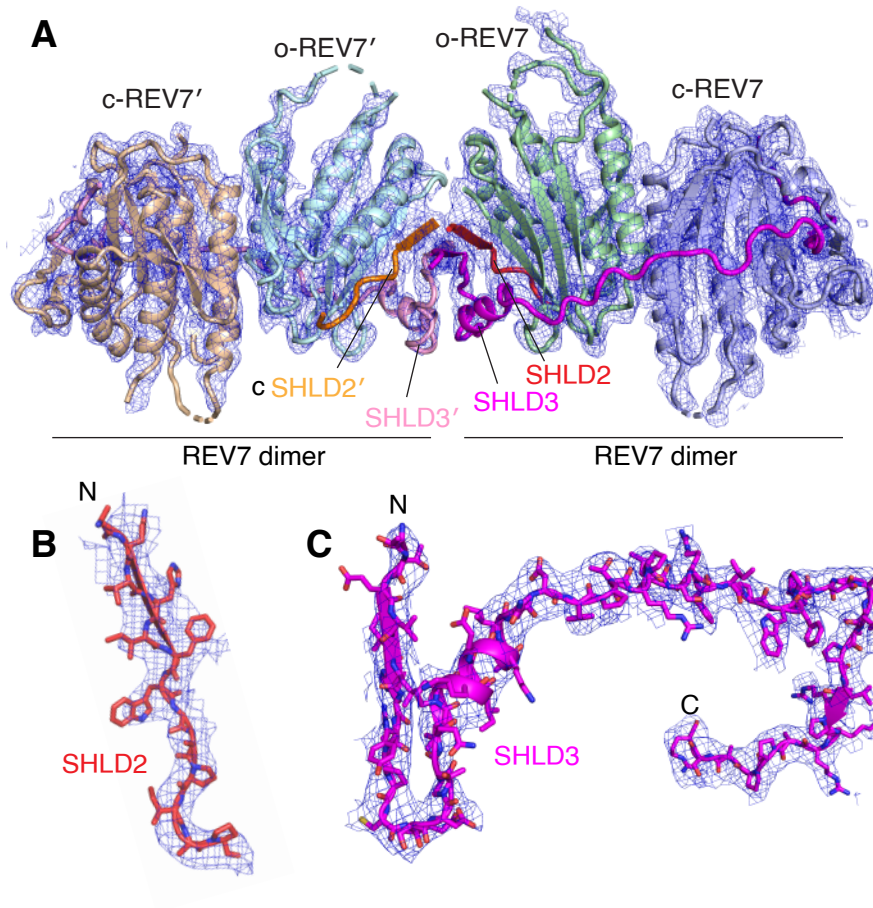

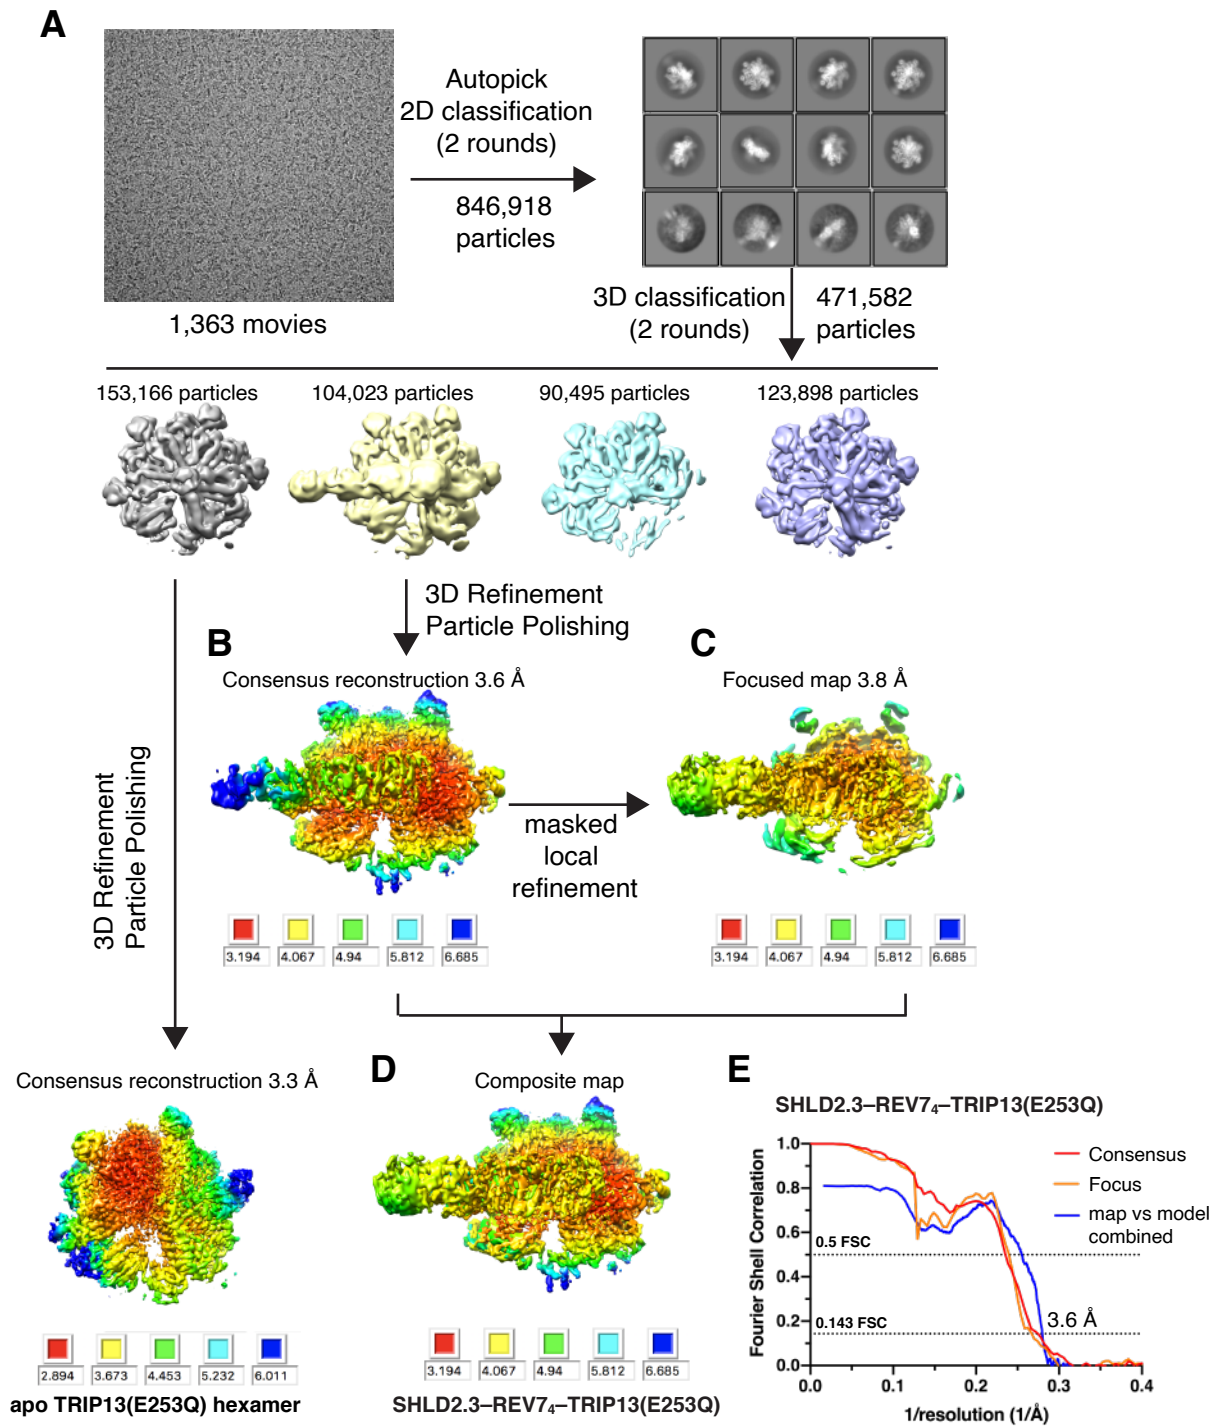



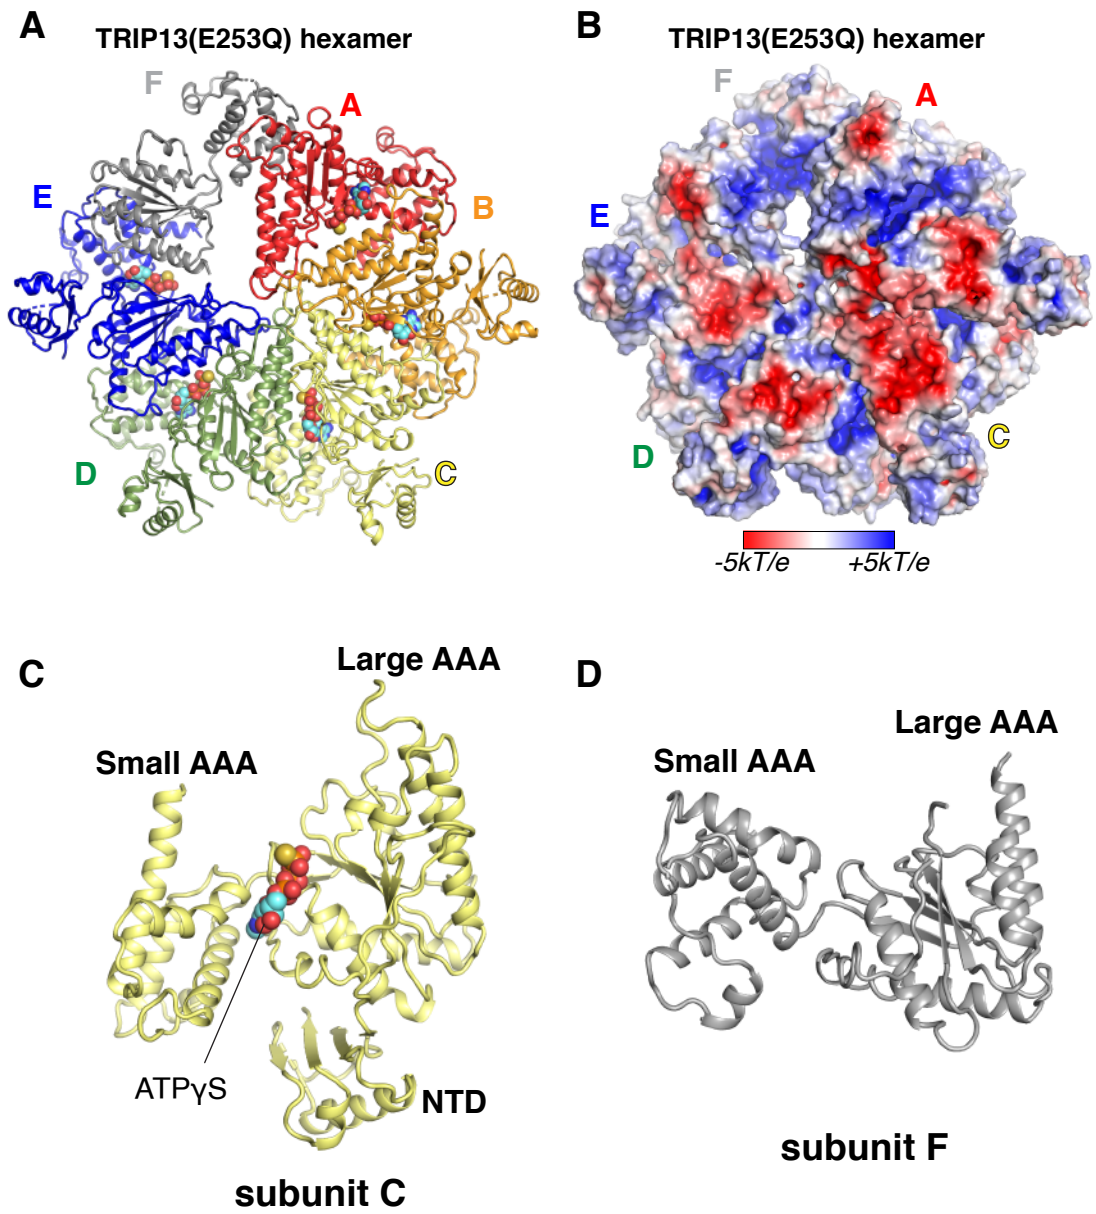

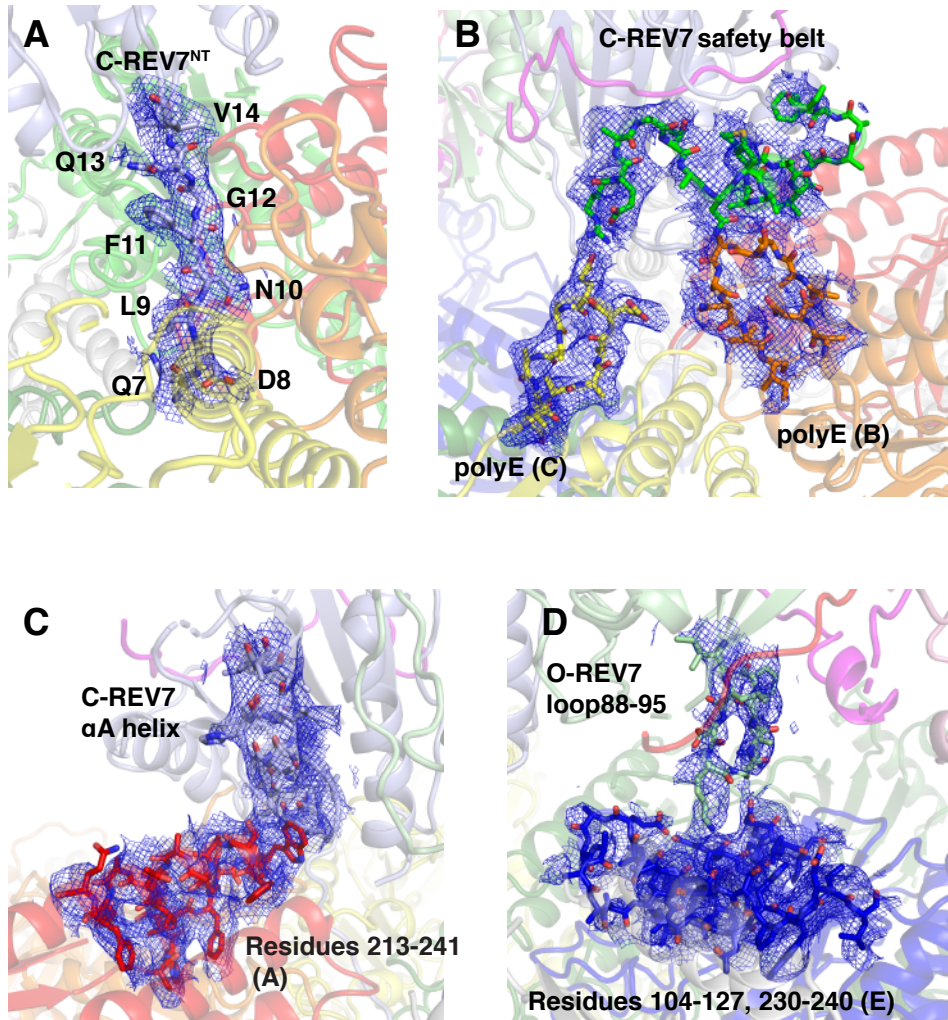

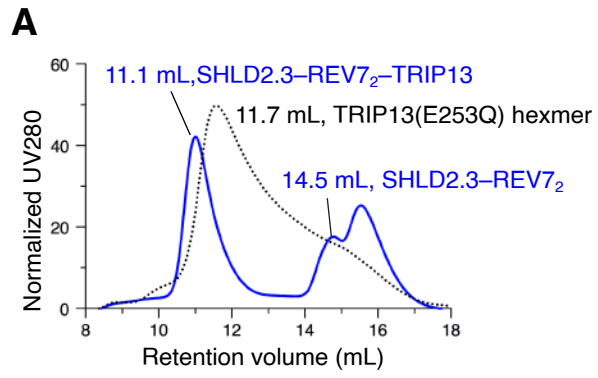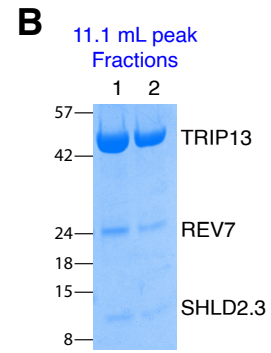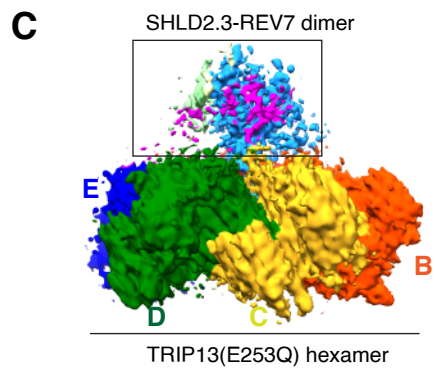

Xie et al., Figure S9

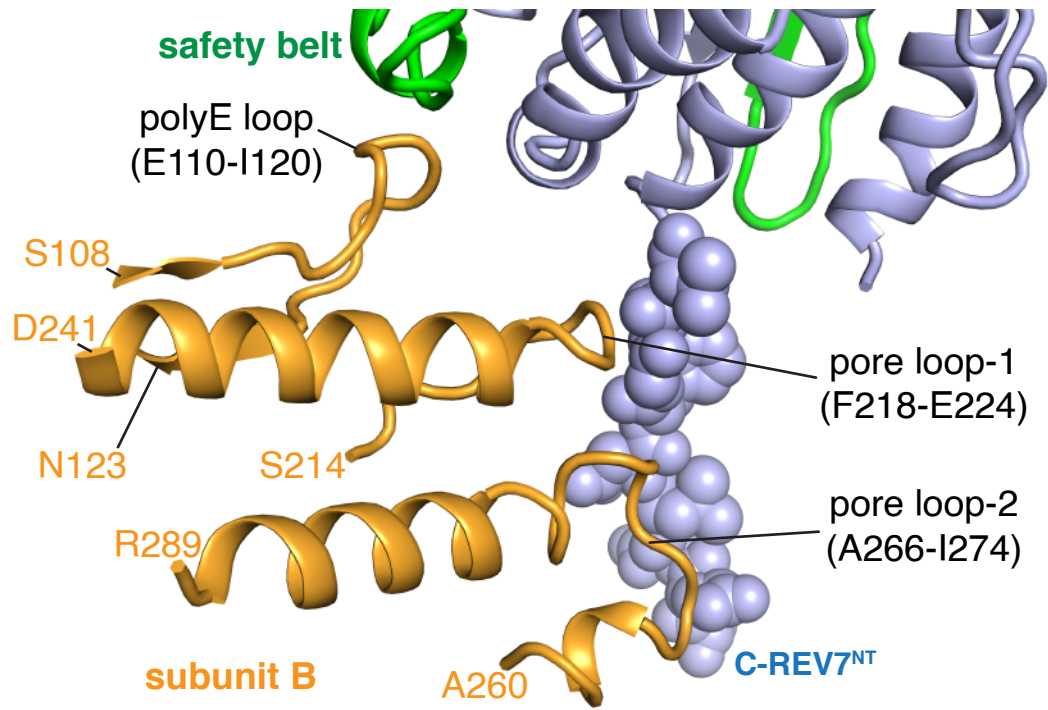

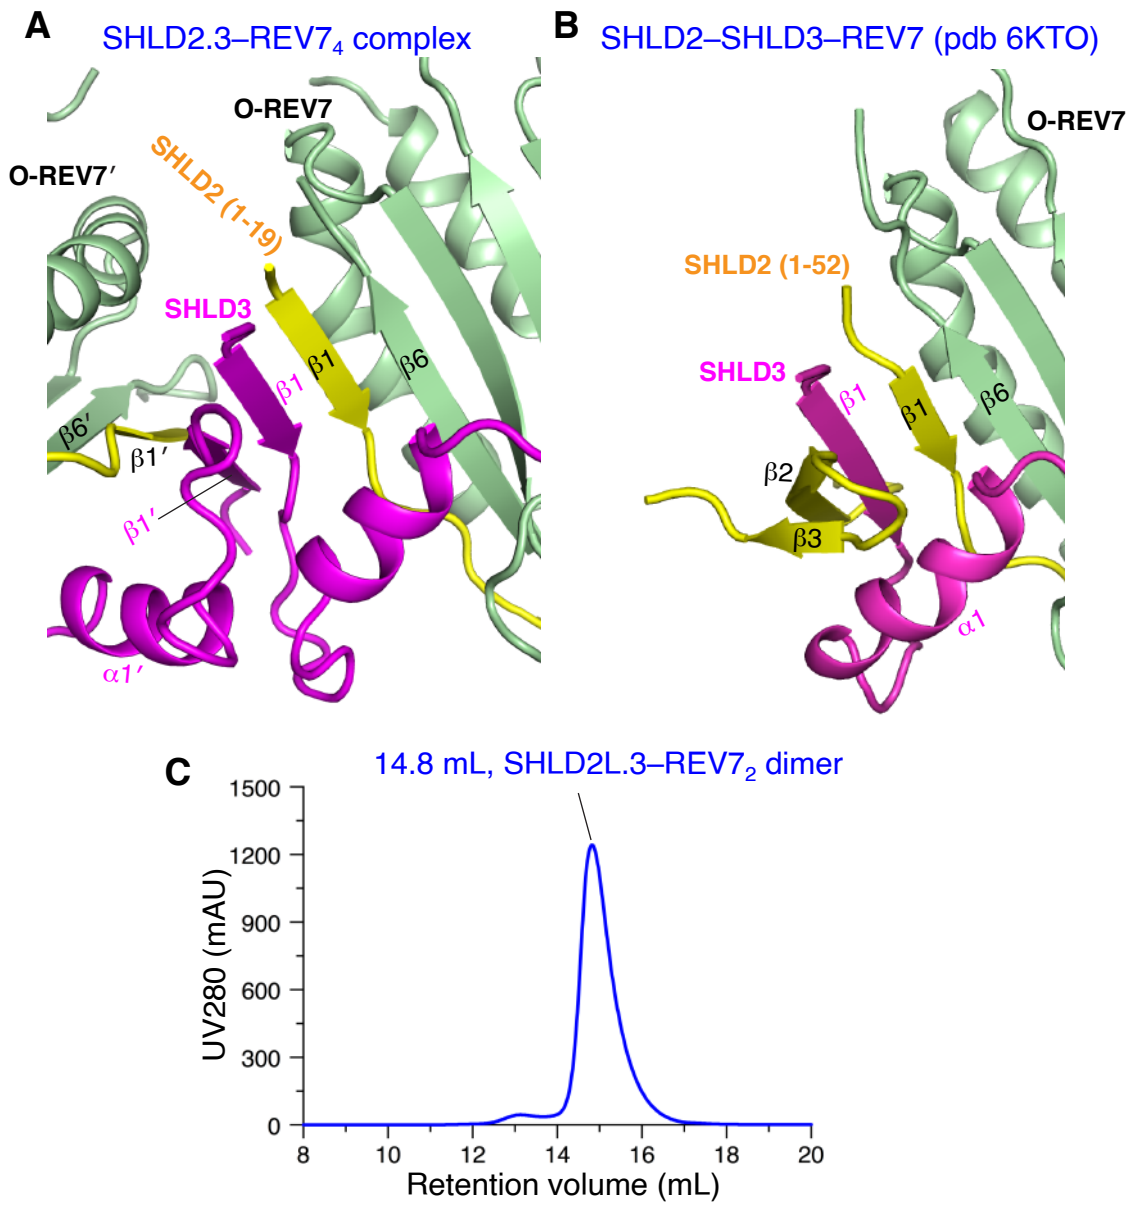

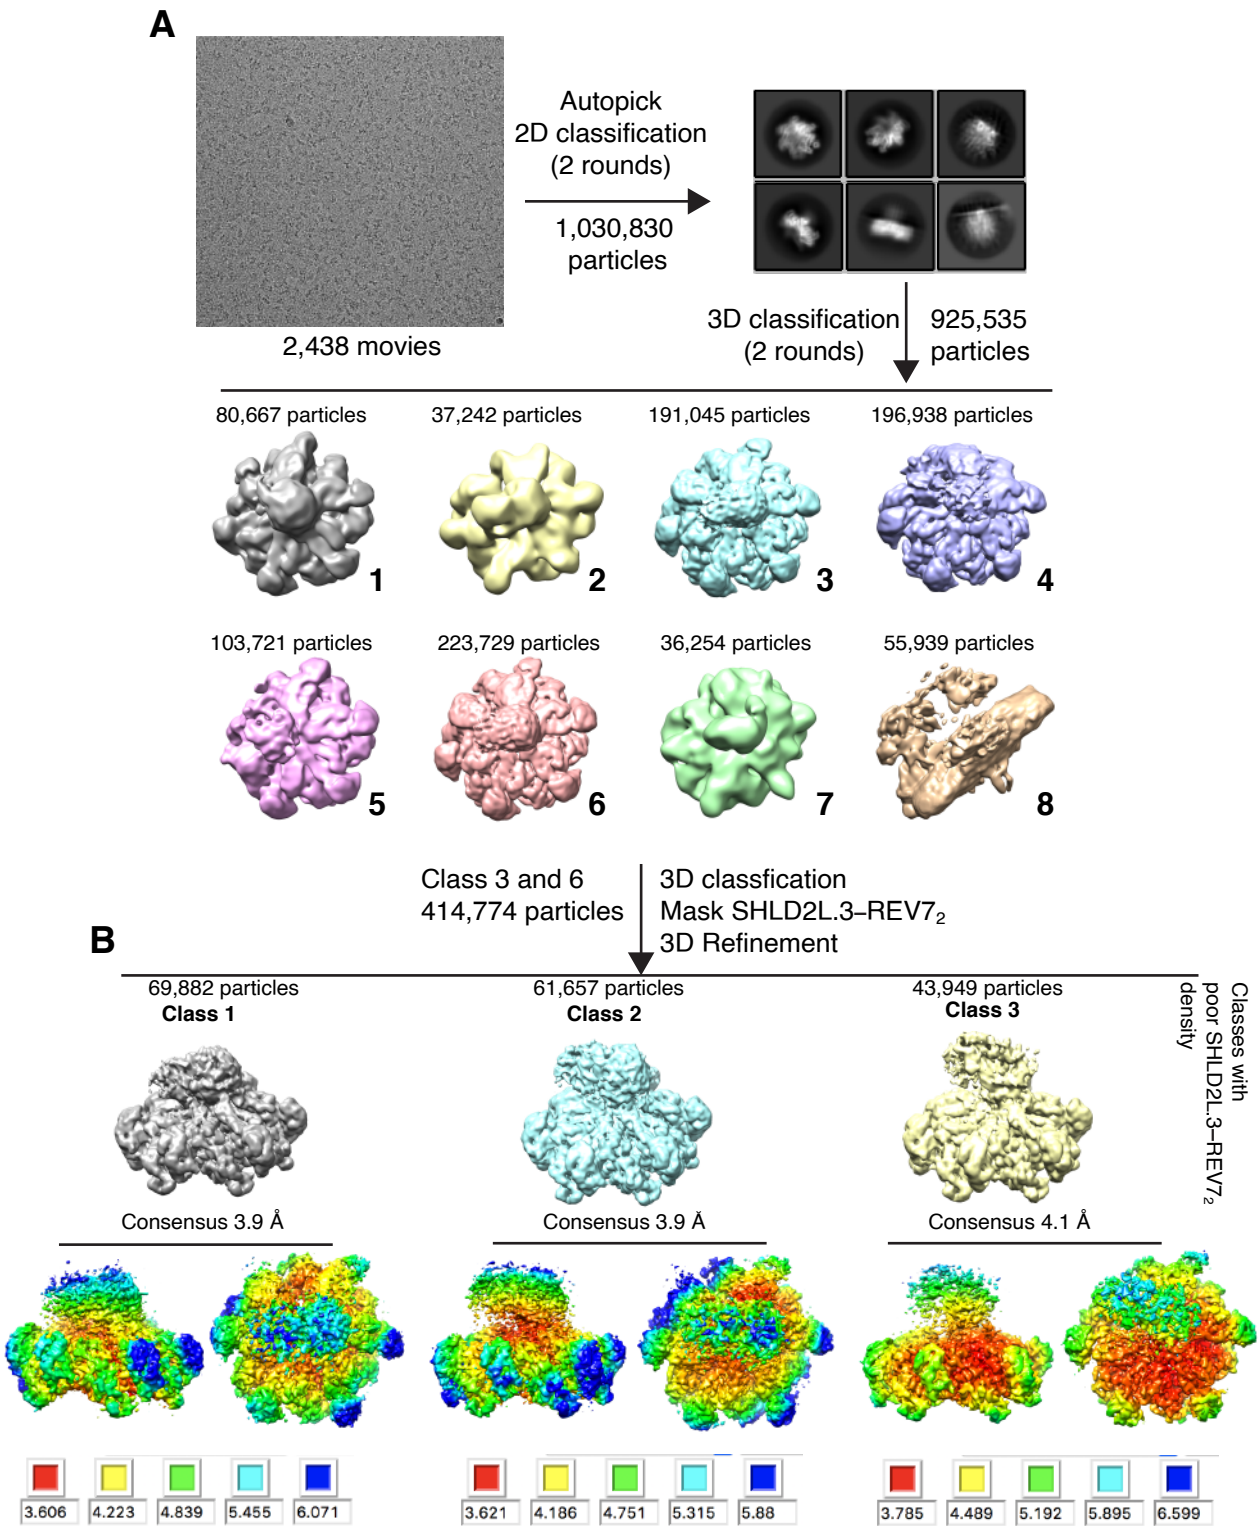

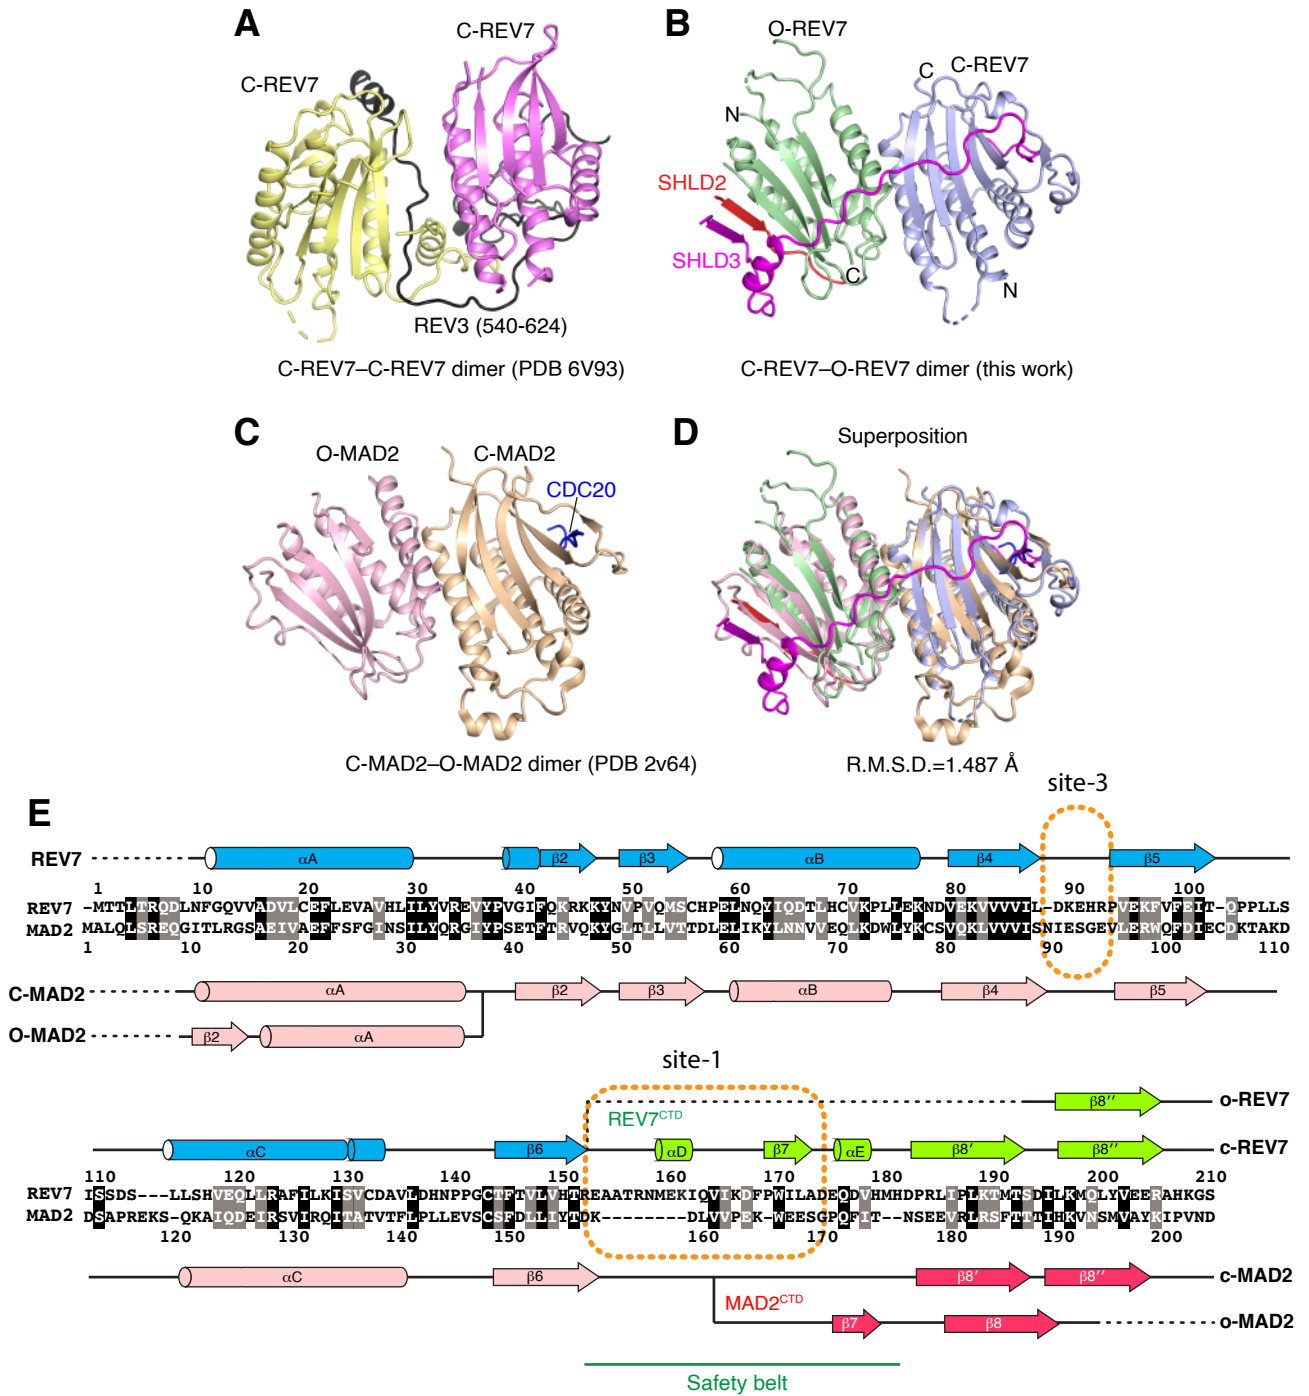

| <b>Table S1. X-ray data collection and refinement statistics.</b> |                                          |                                      |
|-------------------------------------------------------------------|------------------------------------------|--------------------------------------|
| <i>Sample</i>                                                     | SHLD3s-REV7 (PDB 6WW9)                   | SHLD2.3-REV7 <sub>4</sub> (PDB 6WWA) |
| <b>Data collection</b>                                            |                                          |                                      |
| <i>Wavelength (Å)</i>                                             | 0.9792                                   | 0.9792                               |
| <i>Space group</i>                                                | <i>P</i> 4 <sub>3</sub> 2 <sub>1</sub> 2 | <i>I</i> 4 3 2                       |
| <i>Cell dimensions</i>                                            |                                          |                                      |
| <i>a, b, c (Å)</i>                                                | 75.7, 75.7, 220.1                        | 331.84, 331.84, 331.84               |
| <i>α, β, γ (°)</i>                                                | 90, 90, 90                               | 90, 90, 90                           |
| <i>Resolution (Å)</i>                                             | 29.04- 2.70 (2.80-2.70)                  | 39.11-3.80 (3.94-3.80)               |
| <i>R-merge</i>                                                    | 0.165 (1.319)                            | 0.403 (4.971)                        |
| <i>I/σI</i>                                                       | 8.87 (1.42)                              | 10.30 (0.86)                         |
| <i>Completeness (%)</i>                                           | 97.8 (99.3)                              | 99.7 (99.4)                          |
| <i>Redundancy</i>                                                 | 4.3 (4.3)                                | 35.8 (36.4)                          |
| <i>CC1/2</i>                                                      | 0.991 (0.453)                            | 0.999 (0.472)                        |
| <i>Unique Reflections</i>                                         | 18,113 (1,755)                           | 30,856 (3,027)                       |
| <b>Refinement</b>                                                 |                                          |                                      |
| <i>R<sub>work</sub>/R<sub>free</sub> (%)</i>                      | 21.5/24.4                                | 23.7/26.6                            |
| <i>Reflections in refinement</i>                                  | 18,011 (1,755)                           | 30,823 (3,025)                       |
| <i>No. of non-hydrogen atoms</i>                                  |                                          |                                      |
| <i>Macromolecules</i>                                             | 3,543                                    | 6,776                                |
| <i>Protein residues</i>                                           | 434                                      | 835                                  |
| <i>B-factors (Å<sup>2</sup>)</i>                                  |                                          |                                      |
| <i>Macromolecules</i>                                             | 66.35                                    | 189.45                               |
| <i>R.m.s. deviations</i>                                          |                                          |                                      |
| <i>Bond lengths (Å)</i>                                           | 0.003                                    | 0.003                                |
| <i>Bond angles (°)</i>                                            | 0.53                                     | 0.70                                 |
| <i>Ramachandran plots</i>                                         |                                          |                                      |
| <i>Favored (%)</i>                                                | 97.63                                    | 92.69                                |
| <i>Allowed (%)</i>                                                | 2.37                                     | 5.70                                 |



|                                                                       |   |      |
|-----------------------------------------------------------------------|---|------|
| <i>Outliers (%)</i>                                                   | 0 | 1.61 |
| Statistics for the highest-resolution shell are shown in parenthesis. |   |      |

| <b>Table S2. Cryo-EM data collection, processing, and validation statistics.</b> |                                                                    |
|----------------------------------------------------------------------------------|--------------------------------------------------------------------|
| <i>Sample</i>                                                                    | SHLD2.3–REV7 <sub>4</sub> –TRIP13(E253Q)<br>(EMID-23244, PDB 7L9P) |
| <b>Data collection</b>                                                           |                                                                    |
| <i>Microscope</i>                                                                | Titan Krios                                                        |
| <i>Detector</i>                                                                  | Gatan K3                                                           |
| <i>Automation software</i>                                                       | SerialEM                                                           |
| <i>Nominal magnification</i>                                                     | 22,500                                                             |
| <i>Calibrated magnification</i>                                                  | 47,262                                                             |
| <i>Voltage (kV)</i>                                                              | 300 kV                                                             |
| <i>Total dose (e<sup>-</sup>/Å<sup>2</sup>)</i>                                  | 53                                                                 |
| <i>Dose rate (e<sup>-</sup>/pixel/s)</i>                                         | 20                                                                 |
| <i>Number of frames collected</i>                                                | 40                                                                 |
| <i>Defocus range (μm)</i>                                                        | -1.0 to -2.5                                                       |
| <i>Pixel size (Å)</i>                                                            | 1.064                                                              |
| <i>Collected Micrographs</i>                                                     | 1,925                                                              |
| <i>Selected Micrographs</i>                                                      | 1,363                                                              |
| <b>Reconstruction</b>                                                            |                                                                    |
| <i>Initially autopicked particles</i>                                            | 1,212,927                                                          |
| <i>Particles used for classification</i>                                         | 846,918                                                            |
| <i>Particles in the final map</i>                                                | 104,023                                                            |
| <i>Symmetry</i>                                                                  | C1                                                                 |
| <b>Resolution</b>                                                                |                                                                    |
| <i>FSC 0.143 (unmasked/masked, Å)</i>                                            | 3.7/3.6                                                            |
| <i>FSC 0.5 (unmasked/masked, Å)</i>                                              | 4.2/4.0                                                            |
| <i>Map sharpening B factor (Å<sup>2</sup>)</i>                                   | 100                                                                |
| <b>Model composition</b>                                                         |                                                                    |
| <i>Protein</i>                                                                   | 2919                                                               |
| <i>Ligands</i>                                                                   | 5                                                                  |
| <b>Validation</b>                                                                |                                                                    |

|                                    |       |
|------------------------------------|-------|
| <i>MolProbity</i>                  | 2.34  |
| <i>Clash score</i>                 | 20.16 |
| <i>Map Correlation Coefficient</i> | 0.68  |
| <i>R.m.s. deviations</i>           |       |
| <i>Bond lengths (Å)</i>            | 0.008 |
| <i>Bond angles (°)</i>             | 1.238 |
| <i>Ramachandran plots</i>          |       |
| <i>Favored (%)</i>                 | 90.49 |
| <i>Allowed (%)</i>                 | 9.44  |
| <i>Outliers (%)</i>                | 0.07  |
| <i>Rotamer outliers (%)</i>        | 0.58  |
